# Supplementary material
Source: Springer Nature journal article supplement (https://www.springermedizin.de/resource/supplementary/13569_2012_32_MOESM4_ESM.pdf/9676676)

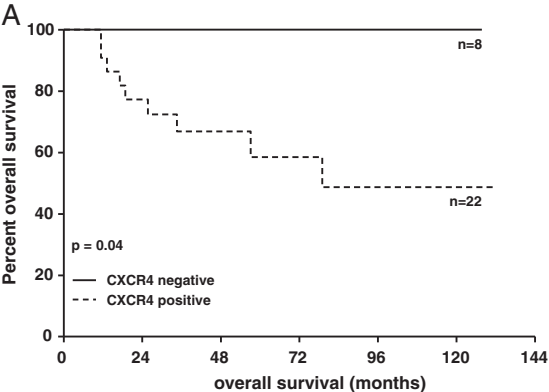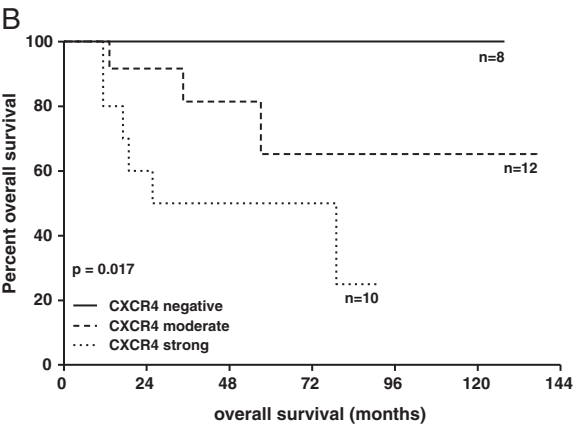

Supplement: MOESM4 [file 9676676]
